# Supplementary material for: The interaction of secreted phospholipase A2-IIA with the microbiota alters its lipidome and promotes inflammation
Source: PubMed Central journal article supplement (PMC8855825; doi:10.1172/jci.insight.152638), 2022-01-25
Supplement: jciinsight-7-152638-s160.pdf [file jciinsight-7-152638-s160.pdf]

| "dada2_input"               | "filtered" | "dada_f" | "dada_r" | "merged" | "nonchim" |       |
|-----------------------------|------------|----------|----------|----------|-----------|-------|
| "final_perc_reads_retained" |            |          |          |          |           |       |
| "26398-Donor_S1"            | 78898      | 62338    | 61766    | 62032    | 57008     | 29322 |
| 37.2                        |            |          |          |          |           |       |
| "26399-Donor_S2"            | 75488      | 59178    | 58371    | 58763    | 51983     | 26605 |
| 35.2                        |            |          |          |          |           |       |
| "26491-Donor_S8"            | 38661      | 31196    | 30766    | 30981    | 27330     | 12079 |
| 31.2                        |            |          |          |          |           |       |
| "26492-Donor_S9"            | 74286      | 59843    | 59041    | 59382    | 52892     | 24456 |
| 32.9                        |            |          |          |          |           |       |
| "26493-Donor_S10"           |            | 85836    | 67271    | 66374    | 66715     | 58822 |
| 25277                       | 29.4       |          |          |          |           |       |
| "26494-Donor_S11"           |            | 75534    | 60422    | 59595    | 59996     | 53883 |
| 25122                       | 33.3       |          |          |          |           |       |
| "26495-Donor_S12"           |            | 100817   | 80205    | 78936    | 79635     | 70272 |
| 32333                       | 32.1       |          |          |          |           |       |
| "26496-Donor_S3"            | 80392      | 63826    | 62853    | 63349    | 54867     | 25360 |
| 31.5                        |            |          |          |          |           |       |
| "26573-Donor_S13"           |            | 83004    | 66343    | 65428    | 65898     | 59016 |
| 25812                       | 31.1       |          |          |          |           |       |
| "26574-Donor_S14"           |            | 75096    | 60573    | 59913    | 60260     | 54554 |
| 24631                       | 32.8       |          |          |          |           |       |
| "26575-Donor_S4"            | 83348      | 65752    | 64719    | 65280    | 57355     | 28605 |
| 34.3                        |            |          |          |          |           |       |
| "26576-Donor_S5"            | 60186      | 46239    | 45811    | 45933    | 42215     | 22565 |
| 37.5                        |            |          |          |          |           |       |
| "26577-Donor_S6"            | 69557      | 54412    | 53979    | 54164    | 50339     | 27645 |
| 39.7                        |            |          |          |          |           |       |
| "26701-Donor_S7"            | 79426      | 62300    | 61503    | 61830    | 54665     | 22990 |
| 28.9                        |            |          |          |          |           |       |
| "26706-D0_S30"              | 63610      | 51324    | 50465    | 50866    | 42727     | 20872 |
| 32.8                        |            |          |          |          |           |       |
| "26706-D21_S51"             | 85381      | 69824    | 68971    | 69197    | 61516     | 29204 |
| 34.2                        |            |          |          |          |           |       |
| "26706-D29_S71"             | 54663      | 44854    | 43909    | 44456    | 38242     | 17824 |
| 32.6                        |            |          |          |          |           |       |
| "26707-D0_S20"              | 67064      | 50866    | 50187    | 50554    | 43697     | 20141 |
| "26707-D21_S41"             | 82789      | 65482    | 64411    | 64866    | 56245     | 24519 |
| 29.6                        |            |          |          |          |           | 30    |
| "26707-D29_S61"             | 83125      | 66127    | 64984    | 65617    | 58876     | 34553 |
| 41.6                        |            |          |          |          |           |       |
| "26761-D0_S21"              | 73134      | 55444    | 54641    | 54978    | 47255     | 21908 |
| "26761-D21_S42"             | 59851      | 46510    | 46056    | 46249    | 42257     | 20820 |
| 34.8                        |            |          |          |          |           | 30    |
| "26761-D29_S62"             | 73550      | 57544    | 56735    | 57241    | 51437     | 24634 |
| 33.5                        |            |          |          |          |           |       |
| "26762-D0_S22"              | 67287      | 49075    | 48585    | 48846    | 44283     | 19542 |
| "26762-D21_S43"             | 78478      | 60289    | 59632    | 59966    | 55065     | 29768 |
| 37.9                        |            |          |          |          |           | 29    |
| "26762-D29_S63"             | 95936      | 75898    | 74932    | 75374    | 68270     | 33625 |
|                             |            |          |          |          |           | 35    |

|                    |       |       |       |       |       |       |    |
|--------------------|-------|-------|-------|-------|-------|-------|----|
| "26763-D0_S31"     | 64263 | 52591 | 51593 | 52118 | 43736 | 19416 |    |
| 30.2               |       |       |       |       |       |       |    |
| "26763-D21_S52"    | 89976 | 73099 | 71867 | 72442 | 61683 | 28549 |    |
| 31.7               |       |       |       |       |       |       |    |
| "26763-D29_S72"    | 62721 | 50054 | 49302 | 49544 | 42836 | 20736 |    |
| 33.1               |       |       |       |       |       |       |    |
| "26783-D0_S15"     | 84714 | 64354 | 62994 | 63718 | 53884 | 23109 |    |
| 27.3               |       |       |       |       |       |       |    |
| "26783-D21_S37"    | 68531 | 54979 | 54462 | 54699 | 49564 | 24999 |    |
| 36.5               |       |       |       |       |       |       |    |
| "26783-D29_S56"    | 64932 | 51621 | 50857 | 51199 | 44597 | 20848 |    |
| 32.1               |       |       |       |       |       |       |    |
| "26784-D0_S16"     | 71656 | 54591 | 53795 | 54152 | 48214 | 21073 |    |
| 29.4               |       |       |       |       |       |       |    |
| "26784-D21_S38"    | 76553 | 58949 | 58512 | 58667 | 53804 | 26629 |    |
| 34.8               |       |       |       |       |       |       |    |
| "26784-D29_S57"    | 79266 | 61752 | 61078 | 61390 | 55239 | 29251 |    |
| 36.9               |       |       |       |       |       |       |    |
| "26785-D0_S25"     | 62159 | 46088 | 45419 | 45766 | 40541 | 18332 |    |
| 29.5               |       |       |       |       |       |       |    |
| "26785-D21_S46"    | 74910 | 58642 | 57937 | 58231 | 51903 | 24344 |    |
| 32.5               |       |       |       |       |       |       |    |
| "26785-D29_S66"    | 82678 | 65936 | 65013 | 65477 | 58046 | 27042 |    |
| 32.7               |       |       |       |       |       |       |    |
| "26786-D0_S26"     | 69322 | 56063 | 55123 | 55442 | 48082 | 20573 |    |
| 29.7               |       |       |       |       |       |       |    |
| "26786-D21_S47"    | 78818 | 63563 | 62843 | 63195 | 56809 | 26456 |    |
| 33.6               |       |       |       |       |       |       |    |
| "26786-D29_S67"    | 97887 | 77769 | 76914 | 77235 | 70055 | 33015 |    |
| 33.7               |       |       |       |       |       |       |    |
| "26787-D0_S27"     | 63905 | 39073 | 38406 | 38801 | 33058 | 14599 |    |
| 22.8               |       |       |       |       |       |       |    |
| "26787-D21_S48"    | 66155 | 54428 | 53551 | 53986 | 47122 | 21819 | 33 |
| "26787-D29_S68"    | 86919 | 70644 | 69503 | 69986 | 60756 | 28677 | 33 |
| "26789-D0_S23"     | 76994 | 62308 | 61640 | 61978 | 55948 | 22839 |    |
| 29.7               |       |       |       |       |       |       |    |
| "26789-D21_S44"    | 73370 | 56774 | 56316 | 56517 | 52110 | 26700 |    |
| 36.4               |       |       |       |       |       |       |    |
| "26789-D29_S64"    | 72457 | 55891 | 55137 | 55488 | 49552 | 23738 |    |
| 32.8               |       |       |       |       |       |       |    |
| "26790-D0_S28"     | 84980 | 68996 | 68024 | 68525 | 59910 | 25597 |    |
| 30.1               |       |       |       |       |       |       |    |
| "26790-D21_S49"    | 81463 | 65185 | 64503 | 64799 | 59086 | 30000 |    |
| 36.8               |       |       |       |       |       |       |    |
| "26790-D29_S69"    | 81022 | 65350 | 64593 | 64875 | 58299 | 30356 |    |
| 37.5               |       |       |       |       |       |       |    |
| "26791-92-D21_S39" |       | 91779 | 72839 | 71936 | 72293 | 63416 |    |
| 29951              |       |       |       |       |       |       |    |
| 32.6               |       |       |       |       |       |       |    |
| "26791-D0_S17"     | 79590 | 60182 | 59192 | 59750 | 50790 | 23573 |    |
| 29.6               |       |       |       |       |       |       |    |

|                 |        |       |       |       |       |       |    |
|-----------------|--------|-------|-------|-------|-------|-------|----|
| "26791-D15_S35" | 80764  | 62124 | 61624 | 61786 | 57512 | 32551 |    |
| 40.3            |        |       |       |       |       |       |    |
| "26791-D29_S58" | 75333  | 59037 | 58462 | 58626 | 53594 | 28710 |    |
| 38.1            |        |       |       |       |       |       |    |
| "26792-D0_S18"  | 72999  | 54954 | 53914 | 54409 | 45103 | 20811 |    |
| 28.5            |        |       |       |       |       |       |    |
| "26792-D15_S36" | 71213  | 57174 | 56722 | 56796 | 52928 | 29636 |    |
| 41.6            |        |       |       |       |       |       |    |
| "26792-D29_S59" | 76107  | 59718 | 58814 | 59249 | 53006 | 29247 |    |
| 38.4            |        |       |       |       |       |       |    |
| "26797-D0_S32"  | 80294  | 66166 | 65108 | 65661 | 57285 | 24289 |    |
| 30.3            |        |       |       |       |       |       |    |
| "26797-D21_S53" | 92563  | 75845 | 74746 | 75169 | 68273 | 34994 |    |
| 37.8            |        |       |       |       |       |       |    |
| "26797-D29_S73" | 80328  | 64857 | 64004 | 64315 | 57401 | 26469 | 33 |
| "26798-D0_S33"  | 85300  | 67852 | 66817 | 67339 | 60175 | 25834 |    |
| 30.3            |        |       |       |       |       |       |    |
| "26798-D21_S54" | 94236  | 74386 | 73344 | 73649 | 66426 | 35705 |    |
| 37.9            |        |       |       |       |       |       |    |
| "26798-D29_S74" | 74512  | 60396 | 59566 | 59994 | 53378 | 22354 | 30 |
| "26833-D0_S29"  | 96891  | 78902 | 77884 | 78257 | 70069 | 29855 |    |
| 30.8            |        |       |       |       |       |       |    |
| "26833-D21_S50" | 79537  | 64910 | 64093 | 64418 | 57889 | 26412 |    |
| 33.2            |        |       |       |       |       |       |    |
| "26833-D29_S70" | 56521  | 44648 | 43860 | 44251 | 37796 | 17912 |    |
| 31.7            |        |       |       |       |       |       |    |
| "26834-D0_S19"  | 92437  | 69448 | 68406 | 68842 | 60302 | 25281 |    |
| 27.3            |        |       |       |       |       |       |    |
| "26834-D21_S40" | 56732  | 44475 | 44006 | 44189 | 39225 | 21869 |    |
| 38.5            |        |       |       |       |       |       |    |
| "26834-D29_S60" | 73444  | 57299 | 56619 | 56933 | 50785 | 26264 |    |
| 35.8            |        |       |       |       |       |       |    |
| "26877-D0_S34"  | 72577  | 59569 | 59018 | 59215 | 54719 | 24083 |    |
| 33.2            |        |       |       |       |       |       |    |
| "26877-D21_S55" | 61457  | 48865 | 48089 | 48463 | 41353 | 22019 |    |
| 35.8            |        |       |       |       |       |       |    |
| "26877-D29_S75" | 80101  | 64646 | 63743 | 64201 | 55735 | 24240 |    |
| 30.3            |        |       |       |       |       |       |    |
| "26878-D0_S24"  | 76275  | 62570 | 61670 | 62085 | 54067 | 23395 |    |
| 30.7            |        |       |       |       |       |       |    |
| "26878-D21_S45" | 82269  | 65640 | 64414 | 64873 | 56283 | 27205 |    |
| 33.1            |        |       |       |       |       |       |    |
| "26878-D29_S65" | 110475 | 86979 | 85831 | 86410 | 78868 | 40713 |    |
| 36.9            |        |       |       |       |       |       |    |
